# Supplementary material
Source: Springer Nature journal article supplement (https://www.springermedizin.de/resource/supplementary/12936_2012_2461_MOESM4_ESM.pdf/9542910)
Supplement: MOESM4 [file 9542910]

### Additional File 4: Design of Studies Included in the Analysis

| First Author | Year of Publication | Country     | No.of trial arms | Prospective Study | Patient Enrolment       | Parasitemia Criteria | Randomization | Control Arm | Age Lower Limit (yrs) | Age Upper Limit (yrs) | Duration of Follow Up (davs) |
|--------------|---------------------|-------------|------------------|-------------------|-------------------------|----------------------|---------------|-------------|-----------------------|-----------------------|------------------------------|
| Di Lorenzo   | 1953                | USA         | 2                | Yes               | Soldiers (Korean)       | No                   | No            | Yes         |                       |                       | 90                           |
| Alving       | 1953                | USA         | 3                | Yes               | Soldiers (Korean)       | No                   | No            | Yes         |                       |                       | 120                          |
| Coatney      | 1953                | USA         | 2                | Yes               | Soldiers (Korean)       | No                   | No            | No          |                       |                       | 180                          |
| Cooper       | 1953                | USA         | 9                | Yes               | Volunteers (Chesson)    | No                   | No            | No          | 21                    | 45                    | 350                          |
| Thaeler      | 1953                | Nicaragua   | 3                | Yes               | In hospital             | No                   | No            | No          |                       |                       | 360                          |
| Alving       | 1955                | USA         | 3                | Yes               | Volunteers (Chesson)    | No                   | No            | No          |                       |                       | 365                          |
| Alving       | 1960                | USA         | 8                | Yes               | Volunteers (Chesson)    | No                   | No            | Yes         |                       |                       | 120                          |
| Basavaraj    | 1960                | India       | 1                | No                | Out patient             | No                   | No            | No          |                       |                       | 480                          |
| Mendoza      | 1963                | Mexico      | 2                | Yes               | Community               | No                   | No            | No          | 1                     |                       | 270                          |
| Martelo      | 1969                | USA         | 2                | Yes               | Soldiers (Vietnam)      | No                   | No            | No          |                       |                       | 180                          |
| Fisher       | 1970                | USA         | 2                | No                | Soldiers (Vietnam)      | No                   | No            | No          |                       |                       | 180                          |
| Contacos     | 1973                | USA         | 1                | Yes               | Volunteers (Chesson)    | No                   | No            | No          |                       |                       | 200                          |
| Sharma       | 1973                | India       | 1                | Yes               | Community               | No                   | No            | No          | 1                     |                       | 365                          |
| Contacos     | 1974                | USA         | 2                | Yes               | Volunteers (W Pakistan) | No                   | No            | No          |                       |                       | 133                          |
| Miller       | 1974                | USA         | 1                | Yes               | Volunteers (Chesson)    | No                   | No            | No          |                       |                       | 270                          |
| Kaplan       | 1974                | USA         | 1                | Yes               | Soldiers (Somalia)      | No                   | No            | No          |                       |                       | 895                          |
| Saint-Yves   | 1977                | PNG         | 3                | Yes               | Out patient             | No                   | Yes           | No          | 10                    | 40                    | 180                          |
| Clyde        | 1977                | USA         | 1                | Yes               | Volunteers (Chesson)    | No                   | No            | No          | 23                    | 41                    | 293                          |
| Roy          | 1977                | India       | 1                | Yes               | Community               | No                   | No            | No          |                       |                       | 365                          |
| Cedillos     | 1978                | El Salvador | 4                | Yes               | Community               | No                   | No            | No          |                       |                       | 270                          |
| Roy          | 1979                | India       | 1                | Yes               | Community               | No                   | No            | No          |                       |                       | 365                          |
| Appavoo      | 1984                | India       | 1                | Yes               | Out patient             | No                   | No            | No          |                       |                       | 365                          |
| Dixon        | 1985                | Thailand    | 3                | Yes               | In hospital             | <100,000/ $\mu$ L    | No            | Yes         | 18                    |                       | 28                           |
| Sinha        | 1989                | India       | 1                | Yes               | Out patient             | No                   | No            | No          | 1                     |                       | 395                          |
| Singh        | 1990                | India       | 2                | Yes               | Out patient             | No                   | No            | No          |                       |                       | 240                          |
| Prasad       | 1991                | India       | 4                | Yes               | Community               | No                   | No            | No          |                       |                       | 1440                         |
| Bunnag       | 1994                | Thailand    | 2                | Yes               | In hospital             | No                   | Yes           | No          | 15                    | 60                    | 540                          |
| Baird        | 1995                | Indonesia   | 6                | Yes               | Community               | >40/ $\mu$ L         | Yes           | Yes         | 6                     | 54                    | 28                           |
| Tan-ariya    | 1995                | Thailand    | 1                | Yes               | Out patient             | No                   | No            | No          | 17                    | 35                    | 100                          |
| Jelinek      | 1995                | Germany     | 1                | Yes               | Travelers               | No                   | No            | No          | 6                     | 74                    | 540                          |
| Srivastava   | 1996                | India       | 3                | Yes               | Community               | No                   | No            | No          | 2                     |                       | 540                          |

#### Additional File 4: Design of Studies Included in the Analysis

| First Author       | Year of Publication | Country               | No.of trial arms | Prospective Study | Patient Enrolment    | Parasitemia Criteria | Randomization | Control Arm | Age Lower Limit (yrs) | Age Upper Limit (yrs) | Duration of Follow Up (days) |
|--------------------|---------------------|-----------------------|------------------|-------------------|----------------------|----------------------|---------------|-------------|-----------------------|-----------------------|------------------------------|
| Fryauff            | 1997                | Indonesia             | 2                | Yes               | Community            | 0.001%-1%            | No            | No          | 15                    |                       | 28                           |
| Smoak              | 1997                | USA                   | 2                | Yes               | Soldiers (Somalia)   | No                   | No            | No          | 18                    | 39                    | 300                          |
| Gogtay             | 1998                | India                 | 1                | Yes               | Out patient          | No                   | No            | No          |                       |                       | 180                          |
| Wilairatana        | 1999                | Thailand              | 4                | Yes               | In hospital          | No                   | No            | No          | 15                    | 65                    | 28                           |
| Luxemburger        | 1999                | Thailand              | 2                | Yes               | Out patient          | No                   | No            | Yes         | 2                     | 55                    | 63                           |
| Gogtay             | 1999                | India                 | 3                | Yes               | In hospital          | No                   | Yes           | Yes         | 16                    | 63                    | 180                          |
| Li                 | 1999                | China                 | 3                | Yes               | Out patient          | Unknown              | No            | No          | 4                     | 53                    | 270                          |
| Rowland            | 1999                | Pakistan              | 2                | Yes               | Out patient          | No                   | Yes           | Yes         | 3                     |                       | 300                          |
| Fang               | 1999                | Taiwan                | 1                | No                | Travelers            | No                   | No            | No          | 6                     | 64                    | 540                          |
| Pukrittayakamee    | 2000                | Thailand              | 9                | Yes               | In hospital          | No                   | Yes           | Yes         | 15                    | 64                    | 28                           |
| Singh              | 2000                | India                 | 1                | Yes               | In hospital          | No                   | No            | No          | 14                    | 70                    | 28                           |
| Villalobos-Salcedo | 2000                | Brazil                | 2                | Yes               | Community            | >100/ $\mu$ L        | Yes           | No          | 12                    | 40                    | 90                           |
| Bergonzoli         | 2000                | Nicaragua, Costa Rica | 4                | Yes               | Community            | No                   | Yes           | No          | 15                    |                       | 180                          |
| Schwartz           | 2000                | Israel                | 1                | No                | Travelers (Ethiopia) | No                   | No            | No          |                       |                       | 365                          |
| Buchachart         | 2001                | Thailand              | 1                | Yes               | In hospital          | No                   | No            | No          | 12                    | 60                    | 28                           |
| Duarte             | 2001                | Brazil                | 1                | Yes               | Community            | No                   | No            | No          | 14                    | 77                    | 180                          |
| Abdon              | 2001                | Brazil                | 3                | Yes               | Out patient          | No                   | Yes           | No          | 12                    | 67                    | 180                          |
| Adak               | 2001                | India                 | 3                | Yes               | Out patient          | No                   | Yes           | Yes         | 15                    | 65                    | 365                          |
| Dua                | 2001                | India                 | 1                | Yes               | Out patient          | No                   | No            | No          |                       |                       | 540                          |
| Lacy               | 2002                | Indonesia             | 1                | Yes               | Community            | No                   | No            | No          | 15                    | 48                    | 28                           |
| Hamedi             | 2002                | Iran                  | 1                | Yes               | In hospital          | 2000-35,000/ $\mu$ l | No            | No          | 15                    | 59                    | 28                           |
| Congpuong          | 2002                | Thailand              | 1                | Yes               | In hospital          | No                   | No            | No          | 14                    |                       | 28                           |
| Yadav              | 2002                | India                 | 2                | Yes               | Community            | No                   | No            | Yes         | 1                     |                       | 365                          |
| Silachamroon       | 2003                | Thailand              | 4                | Yes               | In hospital          | No                   | Yes           | No          | 15                    |                       | 28                           |
| Valibayov          | 2003                | Azerbaijan            | 1                | Yes               | Out patient          | >250/ $\mu$ L        | No            | No          | 6                     | 85                    | 28                           |
| Machado            | 2003                | Brazil                | 1                | Yes               | Community            | No                   | No            | No          |                       |                       | 30                           |
| Fernandopulle      | 2003                | Sri Lanka             | 1                | Yes               | In hospital          | No                   | No            | No          |                       |                       | 180                          |
| Rajgor             | 2003                | India                 | 2                | Yes               | Out patient          | No                   | Yes           | Yes         | 16                    | 88                    | 180                          |
| Da Silva           | 2003                | Brazil                | 8                | Yes               | Out patient          | No                   | Yes           | No          | 14                    |                       | 180                          |
| Hamedi             | 2004                | Thailand              | 1                | Yes               | In hospital          | No                   | No            | No          | 12                    | 56                    | 28                           |
| Walsh              | 2004                | Thailand              | 5                | Yes               | In hospital          | No                   | Yes           | Yes         | 18                    | 55                    | 168                          |

### Additional File 4: Design of Studies Included in the Analysis

| First Author    | Year of Publication | Country           | No. of trial arms | Prospective Study | Patient Enrolment | Parasitemia Criteria  | Randomization | Control Arm | Age Lower Limit (yrs) | Age Upper Limit (yrs) | Duration of Follow Up (days) |
|-----------------|---------------------|-------------------|-------------------|-------------------|-------------------|-----------------------|---------------|-------------|-----------------------|-----------------------|------------------------------|
| Leslie          | 2004                | Pakistan          | 3                 | Yes               | Out patient       | No                    | Yes           | Yes         | 3                     |                       | 270                          |
| Dunne           | 2005                | India             | 2                 | Yes               | In hospital       | <100,000/ $\mu$ L     | Yes           | No          | 18                    | 65                    | 28                           |
| Yeramian        | 2005                | Thailand          | 1                 | Yes               | In hospital       | <25,000/ $\mu$ L      | No            | No          | 18                    | 30                    | 28                           |
| Maguire         | 2006                | Indonesia         | 2                 | Yes               | Community         | No                    | Yes           | No          | 6                     | 58                    | 28                           |
| Krudsood        | 2006                | Thailand          | 2                 | Yes               | In hospital       | No                    | Yes           | No          | 16                    | 51                    | 28                           |
| Tasanor         | 2006                | Thailand          | 2                 | Yes               | Out patient       | 1000-22,000/ $\mu$ l  | Yes           | No          | 15                    | 60                    | 28                           |
| Alvarez         | 2006                | Columbia          | 3                 | Yes               | Out patient       | No                    | Yes           | No          | 15                    |                       | 180                          |
| Haghdooost      | 2006                | Iran              | 1                 | No                | Out patient       | No                    | No            | No          |                       |                       | 2555                         |
| Dao             | 2007                | Vietnam           | 1                 | Yes               | In hospital       | 500-50,000/ $\mu$ L   | No            | No          |                       |                       | 28                           |
| Krudsood        | 2007                | Thailand          | 2                 | Yes               | In hospital       | No                    | Yes           | No          | 15                    | 65                    | 28                           |
| Krudsood        | 2008                | Thailand          | 6                 | Yes               | In hospital       | No                    | Yes           | No          | 12                    | 60                    | 28                           |
| Leslie          | 2008                | Pakistan          | 3                 | Yes               | Out patient       | No                    | Yes           | Yes         | 4                     | 80                    | 330                          |
| Lee             | 2009                | Republic of Korea | 1                 | Yes               | In hospital       | No                    | No            | No          | 19                    | 50                    | 28                           |
| Carmona-Fonseca | 2009                | Columbia          | 4                 | Yes               | Out patient       | >1000/ $\mu$ L        | Yes           | No          | 2                     | 50                    | 120                          |
| Orjuela-Sanchez | 2009                | Brazil            | 2                 | Yes               | Community         | No                    | No            | No          | 1                     | 75                    | 336                          |
| Moon            | 2009                | Republic of Korea | 1                 | No                | In hospital       | No                    | No            | No          |                       |                       | 660                          |
| Pukrittayakamee | 2010                | Thailand          | 2                 | Yes               | In hospital       | No                    | Yes           | No          | 14                    | 61                    | 28                           |
| Takeuchi        | 2010                | Thailand          | 2                 | Yes               | Community         | No                    | Yes           | No          |                       |                       | 90                           |
| Yeshiwondim     | 2010                | Ethiopia          | 3                 | Yes               | Out patient       | No                    | Yes           | Yes         | 4                     | 65                    | 157                          |
| Muhamed         | 2011                | Thailand          | 1                 | Yes               | Out patient       | 1000-100,000/ $\mu$ l | No            | No          | 15                    | 60                    | 42                           |
| Maneeboonyang   | 2011                | Thailand          | 2                 | Yes               | Community         | No                    | No            | No          | 1                     | 80                    | 90                           |
| Pukrittayakamee | 1994a               | Thailand          | 3                 | Yes               | In hospital       | No                    | Yes           | No          | 15                    | 50                    | 30                           |
| Pukrittayakamee | 1994b               | Thailand          | 3                 | Yes               | In hospital       | No                    | Yes           | Yes         | 15                    | 50                    | 28                           |
| Looareesuwan    | 1999a               | Thailand          | 2                 | Yes               | In hospital       | No                    | Yes           | Yes         | 12                    | 63                    | 28                           |
| Looareesuwan    | 1999b               | Thailand          | 1                 | Yes               | In hospital       | >40/ $\mu$ L          | No            | No          | 15                    | 52                    | 84                           |
